# Supplementary material
Source: Springer Nature journal article supplement (https://www.springermedizin.de/resource/supplementary/12871_2013_352_MOESM2_ESM.pdf/9429202)

Mean PIP

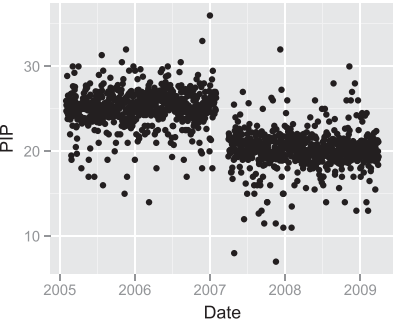

Mean Vt

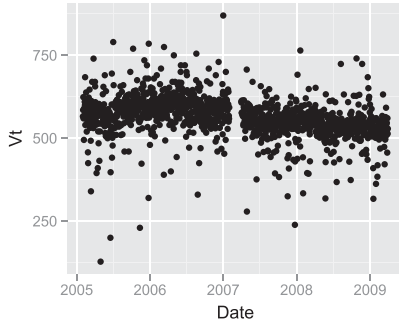

Mean Delta P

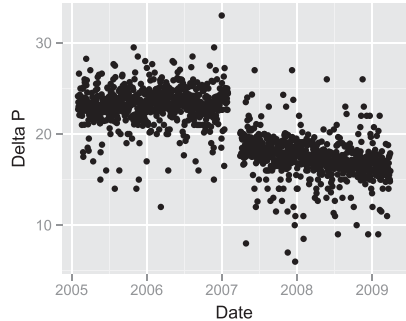

Mean PEEP

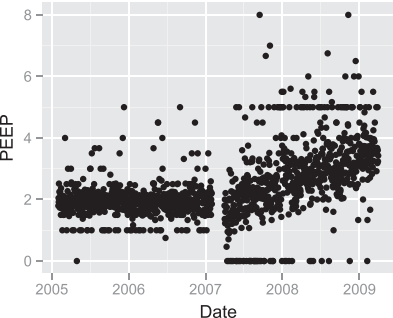

Mean Vt cc/kg PBW

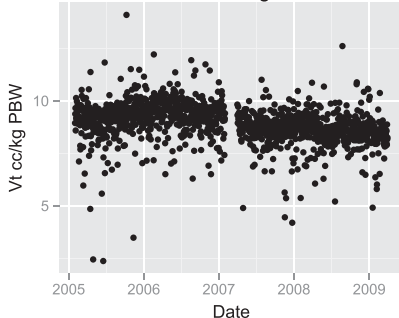

Mean RR

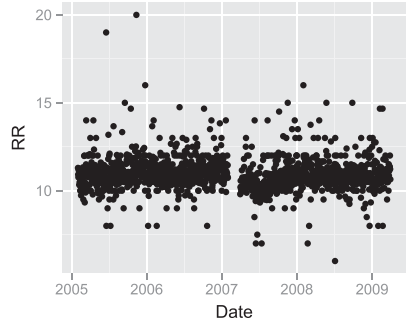

Supplement: MOESM2 [file 9429202]
